# Supplementary material for: H+- and Na+- elicited rapid changes of the microtubule cytoskeleton in the biflagellated green alga Chlamydomonas
Source: eLife journal article supplement (doi:10.7554/elife.26002), 2017-09-06
Supplement: supp [file elife-26002-supp-v1.zip]

Archive with 8 entries (8 files):
- elife_poa_e26002_Figure_5_figure_supplement_1.jpg
- elife_poa_e26002_Transparent_Reporting_File.pdf
- elife_poa_e26002_Video_2.avi
- elife_poa_e26002_Video_3.avi
- elife_poa_e26002_Video_4.avi
- elife_poa_e26002_Video_6.avi
- elife_poa_e26002_Video_1.avi
- elife_poa_e26002_Video_5.avi
